# Supplementary material for: Dual Knockdown of Musashi RNA-Binding Proteins MSI-1 and MSI-2 Attenuates Putative Cancer Stem Cell Characteristics and Therapy Resistance in Ovarian Cancer Cells
Source: MDPI journal article supplement (doi:10.3390/ijms222111502), 2021-10-25

## Supplementary Material

*Supplementary Table S1. SiRNAs used for knockdown.*

| siRNA                   | Manufacturer            | Manufacturer's ID | UniGene ID |
|-------------------------|-------------------------|-------------------|------------|
| MSI-1                   | ThermoFisher Scientific | S8980             | Hs.158311  |
| MSI-2                   | ThermoFisher Scientific | S42757            | Hs.658922  |
| <i>Negative Control</i> | ThermoFisher Scientific | 4390843           | -          |

*Supplementary Table S2. TaqMan probes used for qPCR.*

| Gene    | Manufacturer                             | Primer sequence                                                                                   |
|---------|------------------------------------------|---------------------------------------------------------------------------------------------------|
| NUMB    | ThermoFisher Scientific<br>Hs00377772_m1 | <i>Full product details can be found on the manufacturer's website using the catalogue number</i> |
| 18S     | ThermoFisher Scientific<br>Hs99999901_s1 |                                                                                                   |
| MSI-1   | ThermoFisher Scientific<br>Hs00159291_m1 |                                                                                                   |
| MSI-2   | ThermoFisher Scientific<br>Hs00292670_m1 |                                                                                                   |
| ALDH1A1 | ThermoFisher Scientific<br>Hs00167445_m1 |                                                                                                   |
| ALDH4A1 | ThermoFisher Scientific<br>Hs00186689_m1 |                                                                                                   |

*Supplementary Table S3. Primers used for qPCR with SYTO9.*

| Gene    | Manufacturer           | Primer sequence                                                                                    |
|---------|------------------------|----------------------------------------------------------------------------------------------------|
| HPRT    | Qiagen<br>(QT00059066) | <i>Full product details can be found on the manufacturer's website using the catalogue number.</i> |
| NOTCH-1 | Biolegio               | Fwd: GGTGAGACCTGCCTGAATG<br>Rev: GTTGGGGTCCTGGCATC                                                 |
| NOTCH-2 | Biolegio               | Fwd: AACTGTCAGACCCTGGTGAAC<br>Rev: CGACAAGTGTAGCCTCCAATC                                           |
| NOTCH-3 | Biolegio               | Fwd: TGTGCAAATGGAGGTCGTT<br>Rev: CCTGAGTGACAGGGGTCCT                                               |

*Supplementary Table S4. Antibodies used for Western Blotting.*

| Target  | Manufacturer              | Catalogue number |
|---------|---------------------------|------------------|
| NUMB    | Santa Cruz                | sc-136554        |
| NOTCH-1 | Santa Cruz                | sc-376403        |
| NOTCH-3 | Cell Signaling Technology | 5276             |
| p21     | Cell Signaling Technology | 2947             |
| MSI-1   | R & D Systems             | AF2628           |
| MSI-2   | Santa Cruz                | sc-517212        |

|                     |               |         |
|---------------------|---------------|---------|
| Tubulin             | Santa Cruz    | sc-5286 |
| Anti-Rabbit IgG HRP | R & D Systems | HAF008  |
| Anti-Mouse IgG HRP  | R & D Systems | HAF007  |

*Supplementary Table S5: Genes analyzed in the ovarian cancer database.*

| Gene         | ID           |
|--------------|--------------|
| MSI-1        | A_23_P139795 |
| MSI-2        | A_23_P369479 |
| NUMB         | A_23_P88381  |
| NOTCH-3      | A_24_P399606 |
| CDKN1A (p21) | A_23_P59210  |
| MYC          | A_24_P178011 |
| ALDH4A1      | A_24_P263036 |

*Supplementary Table S6: Surviving fractions after irradiation in PA-1 cells with and without double knockdown.*

| Radiation dose | Control | MSI-1/-2 Knockdown |
|----------------|---------|--------------------|
| 0 Gy           | 100     | 100                |
| 2 Gy           | 41,94   | 22,98              |
| 4 Gy           | 14,24   | 9,68               |
| 6 Gy           | 2,82    | 1,83               |

*Supplementary Table S7: Surviving fractions after irradiation in Caov-3 cells with and without double knockdown.*

| Radiation dose | Control | MSI-1/-2 Knockdown |
|----------------|---------|--------------------|
| 0 Gy           | 100     | 100                |
| 2 Gy           | 42,03   | 32,92              |
| 4 Gy           | 7,18    | 5,82               |
| 6 Gy           | 0,99    | 0,47               |

Supplementary Figure S1. Musashi-1 (MSI-1) and Musashi-2 (MSI-2) RNA levels in both cell lines after knockdown with MSI-1 and MSI-2 siRNA, quantified by quantitative polymerase chain reaction (qPCR). mRNAs were repressed by 74% to 85% percent. Cells were transfected with a control siRNA and MSI-1 / -2 siRNAs as detailed in the methods section (at least  $n = 3$ , \*\*\*  $p < 0.001$ , error bars indicate standard error of the mean (s.e.m.)).

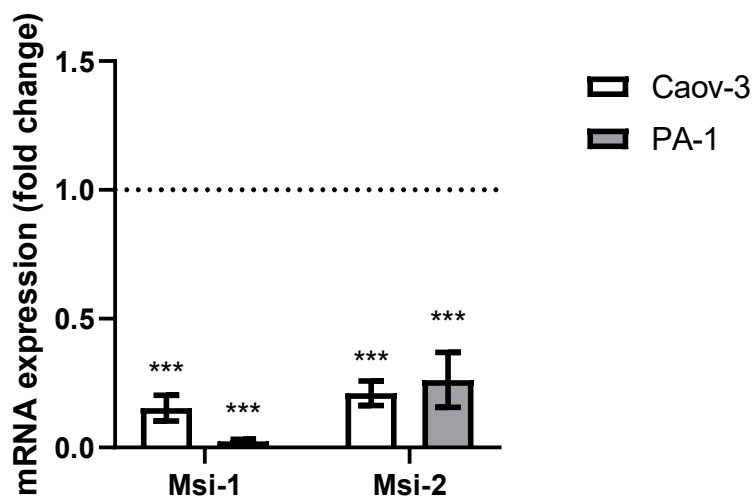

Supplementary figure S2. Musashi-1 (MSI-1) and Musashi-2 (MSI-2) protein levels in both cell lines after knockdown with MSI-1 and MSI-2 siRNA, quantified by Western Blot analysis. Proteins were repressed by at least 50% – 90%, except for MSI-2 in Caov-3. Cells were transfected with a control siRNA and MSI-1/-2 siRNAs as detailed in the methods section (at least  $n = 3$ , \*\*\*  $p < 0.001$ , error bars indicate standard error of the mean (s.e.m.)) **A**: Western Blot results. **B**: representative Western Blot staining.

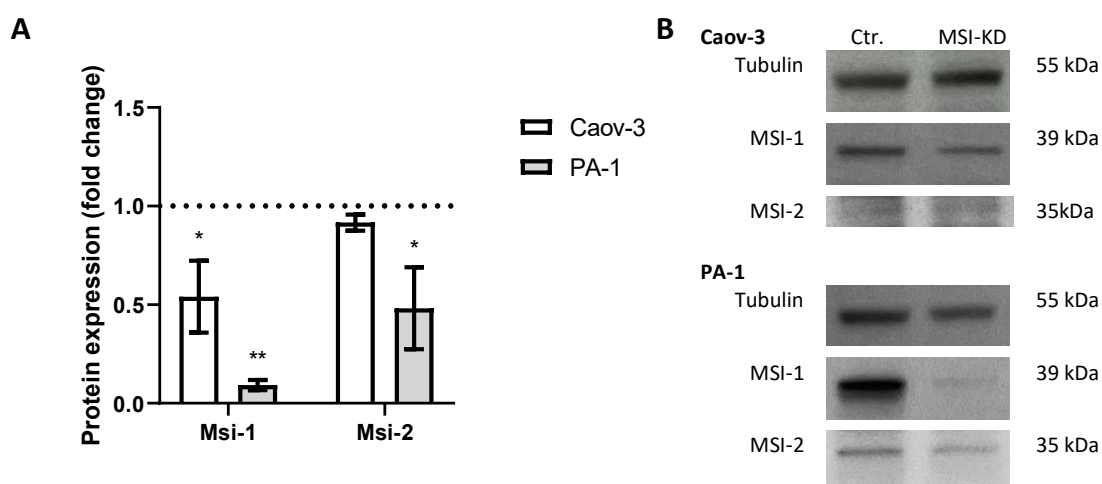

Supplementary figure S3. Relative protein expression levels in Caov-3 cells. The expression was normalized to Tubulin as reference protein (error bars indicate standard error of the mean (s.e.m.)).

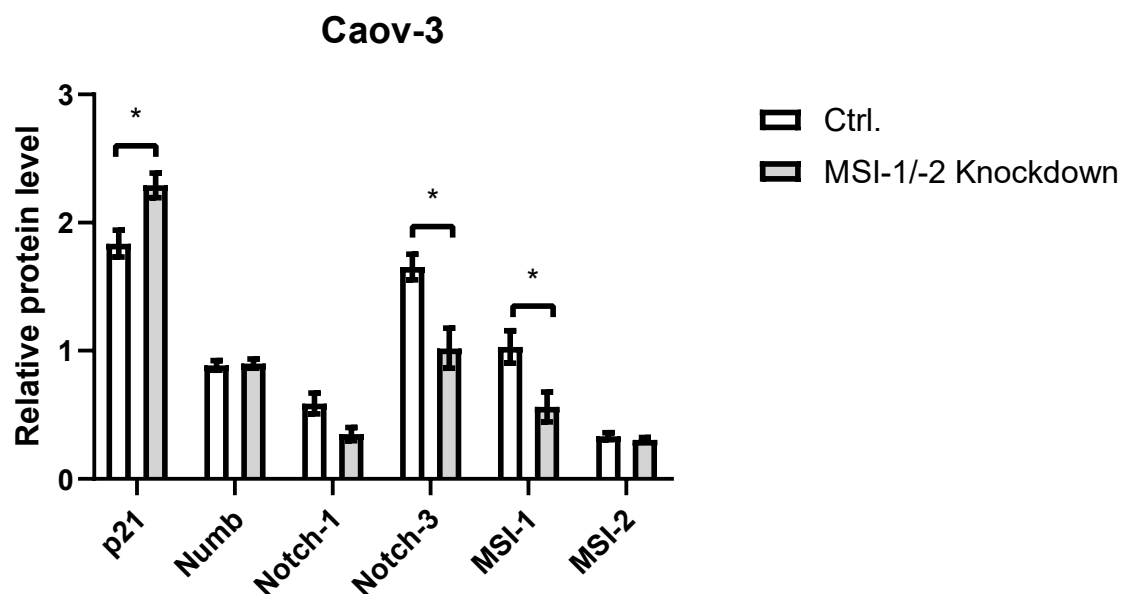

Supplementary figure S4. Relative protein expression levels in PA-1 cells. The expression was normalized to Tubulin as reference protein (error bars indicate standard error of the mean (s.e.m.)).

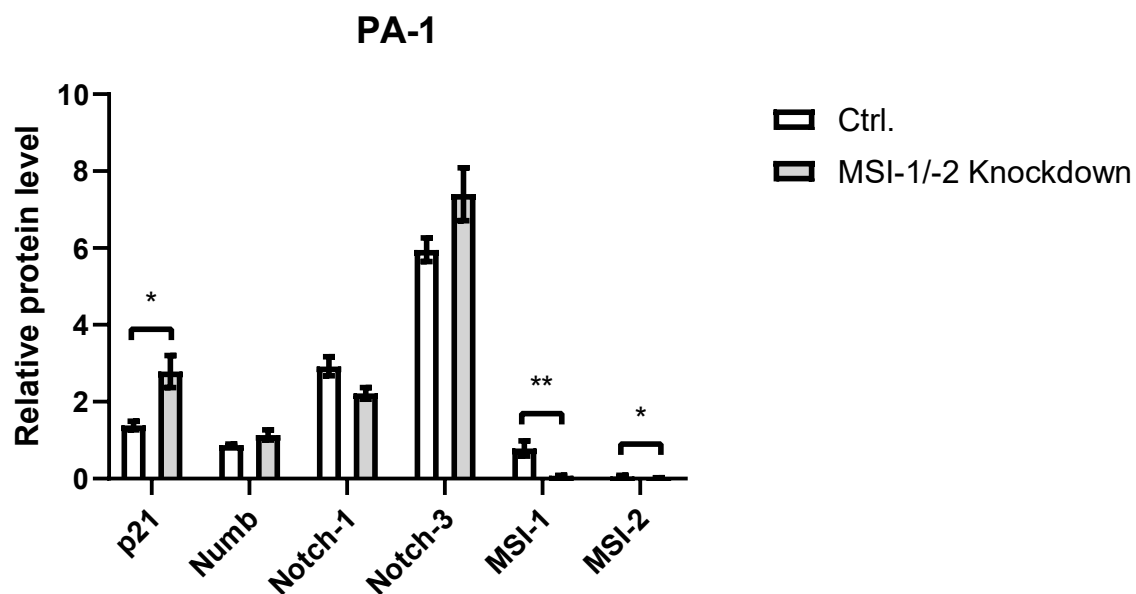

*Supplementary Figure S5. Representative flow cytometric measurement of ALDH activity using Aldeflour assay in PA-1 cells, shown with a logarithmic x scale. ALDH activity barely exceeded the diethylaminobenzaldehyde (DEAB) control on baseline and no significant changes after knockdown were found.*

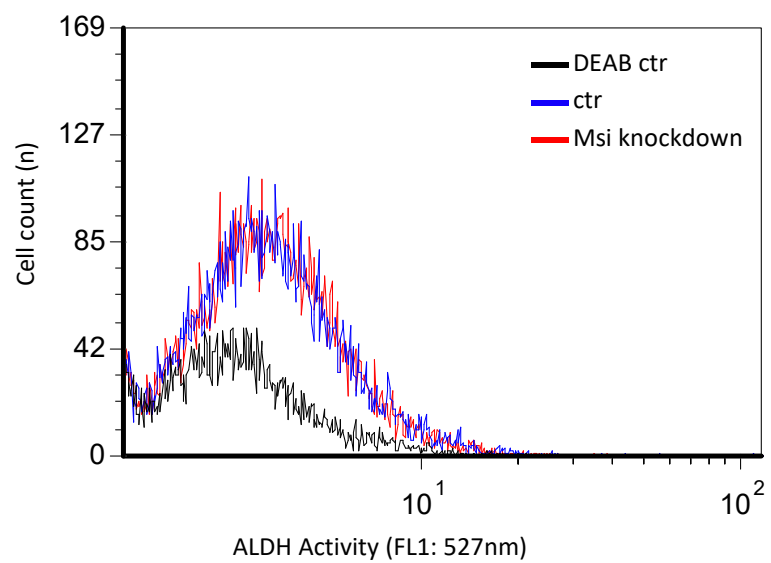

Supplement: s1 [file s1]
